# Supplementary material for: Comparison of patient perceptions of Telehealth-supported and specialist nursing interventions for early stage COPD: a qualitative study
Source: Springer Nature journal article supplement (doi:10.1186/s12913-016-1623-z), 2016-08-22
Supplement: MOESM1 [file 10604694]

**Pilot study in preparation for a Pragmatic Randomized Controlled Trial of Tele-Health for Early Stage Chronic Obstructive Pulmonary Disease**

**TOPIC GUIDE**

***Patients in Technology-Assisted Cohort***

**1. Aim of Interviews:**

To identify why the patient accepted technology as part of their care post hospital discharge for early stage COPD.

**2. Introduction:**

- Introduce yourself
- Introduce the study i.e. about the participants experience of the technology-assisted community nursing service for COPD
- Reassure re: confidentiality and anonymity:
  - Confirm that the interview is solely for the use of the researchers and any discussions will not be communicated in any way to any service provider
  - The report will pull together findings from all participants in the study and no individual will be identified.
- Remind on length of interview
- Introduce tape recorder and explain transcription, data storage and destruction (post publication of findings)
- Check to see if the participant is willing for the researcher to use a tape recorder
  - If yes, proceed
  - If no, researcher to record notes manually and explain that the written notes are to be used as an aide-memoire for the researcher
- Check if participant has any questions at all at this stage
- Check if participant still happy to participate in the interview
- Thank the person for agreeing to participate

**3. Approach:**

- Who told you about the technology?
- What were you told about the technology?

- Did they explain everything you needed to know about the technology at that time?
- Did you have any additional questions at that time?
- Were you happy with how everything was explained about the technology?
- Is there anything you would change about your introduction to the technology?

#### **4. First thoughts**

- Who told you about the technology that you may be asked to use?
- What was your first reaction?
- Did you have any concerns about the technology?
  - What were they?
    - Did you worry about being able to use it?
    - Did you worry about breaking it?
- Did you ask for any more information about the technology?
  - What did you want to know?
  - Who did you ask?
  - Were they able to answer your questions?
- Were you shown the equipment before you agreed to use it?
- If you were shown the equipment, who showed the equipment to you?
- If you were shown the equipment, what did you think of the equipment when you saw it?
- Did you have any concerns about using the equipment when you saw it?
- How confident were you that there was someone available to help you with the equipment if you needed them?
- Were there any other reasons apart from the ones we have already discussed why you decided that you did want to use any technology as part of your care?

#### **5. Final thoughts:**

- Do you have any final thoughts/comments about the equipment?
- Do you have any final thoughts/comments about the service?
- Is there anything else you would like to ask about the research?
- Thank the participant for their time and contribution
